# Supplementary material
Source: PubMed Central journal article supplement (PMC1383557)
Supplement: 7600976s1.pdf [file 7600976s1.pdf]

## SUPPLEMENTARY DATA

Table I. Localization of lac<sup>OP</sup>-tagged loci

|                                              | G1 phase    |     |                       |                            | S phase     |     |                            |                            |
|----------------------------------------------|-------------|-----|-----------------------|----------------------------|-------------|-----|----------------------------|----------------------------|
|                                              | % in zone 1 | n   | p value t-test        | p value $\chi^2$           | % in zone 1 | n   | p value t-test             | p value $\chi^2$           |
| Tel 6R <sup>nat</sup>                        | 59.1        | 110 | 1.3×10 <sup>-4</sup>  | 6.2×10 <sup>-8</sup>       | 55.6        | 135 | 2.4×10 <sup>-4</sup>       | 1.4×10 <sup>-7</sup>       |
| Tel 14L <sup>nat</sup>                       | 52.9        | 257 | 7.4×10 <sup>-6</sup>  | 8.1×10 <sup>-11</sup>      | 58.2        | 153 | 1.3×10 <sup>-5</sup>       | 6.0×10 <sup>-10</sup>      |
| Tel 7L <sup>nat</sup>                        | 57.3        | 391 | 1.7×10 <sup>-11</sup> | 8.1×10 <sup>-25</sup>      | 58.2        | 165 | 5.9×10 <sup>-6</sup>       | 9.9×10 <sup>-11</sup>      |
| Tel 8L <sup>nat</sup>                        | 46.2        | 262 | 2.6×10 <sup>-3</sup>  | 2.6×10 <sup>-5</sup>       | 42.5        | 120 | <b>8.3×10<sup>-2</sup></b> | 3.8×10 <sup>-2</sup>       |
| Tel 5R <sup>nat</sup>                        | 38.6        | 272 | <b>0.2</b>            | <b>5.4×10<sup>-2</sup></b> | 64.8        | 91  | 2.1×10 <sup>-5</sup>       | 7.7×10 <sup>-34</sup>      |
| Tel 6R <sup>tr</sup>                         | 52.4        | 431 | 1.5×10 <sup>-8</sup>  | 6.4×10 <sup>-17</sup>      | 58.5        | 195 | 6.4×10 <sup>-7</sup>       | 5.6×10 <sup>-14</sup>      |
| Tel 8L <sup>tr</sup>                         | 45.6        | 333 | 1.2×10 <sup>-3</sup>  | 2.6×10 <sup>-7</sup>       | 47.7        | 134 | 1.6×10 <sup>-2</sup>       | 1.3×10 <sup>-4</sup>       |
| Tel 5R <sup>tr</sup>                         | 50.7        | 276 | 3.5×10 <sup>-5</sup>  | 4.3×10 <sup>-10</sup>      | 56.3        | 112 | 1.8×10 <sup>-6</sup>       | 1.3×10 <sup>-4</sup>       |
| Tel 6R <sup>nat</sup> <i>ku70Δ</i>           | 30          | 223 | <b>0.5</b>            | <b>0.4</b>                 | 36.2        | 174 | <b>0.6</b>                 | <b>0.7</b>                 |
| Tel 6R <sup>tr</sup> <i>ku70Δ</i>            | 46.7        | 227 | 3.7×10 <sup>-3</sup>  | 7.3×10 <sup>-4</sup>       | 58.8        | 131 | 3.6×10 <sup>-5</sup>       | 1.2×10 <sup>-9</sup>       |
| Tel 8L <sup>nat</sup> <i>ku70Δ</i>           | 33.8        | 207 | <b>0.9</b>            | <b>0.5</b>                 | 43.6        | 94  | <b>0.1</b>                 | <b>5.6×10<sup>-2</sup></b> |
| Tel 8L <sup>tr</sup> <i>ku70Δ</i>            | 53.3        | 214 | 7.1×10 <sup>-5</sup>  | 1.1×10 <sup>-8</sup>       | 55.2        | 67  | 1.1×10 <sup>-2</sup>       | 3.6×10 <sup>-4</sup>       |
| Tel 5R <sup>nat</sup> <i>ku70Δ</i>           | 38.7        | 284 | <b>0.2</b>            | 5.1×10 <sup>-3</sup>       | 41.3        | 126 | <b>0.2</b>                 | <b>0.1</b>                 |
| Tel 5R <sup>tr</sup> <i>ku70Δ</i>            | 45.9        | 231 | 5.8×10 <sup>-3</sup>  | 8.1×10 <sup>-6</sup>       | 57.6        | 118 | 1.8×10 <sup>-4</sup>       | 6.3×10 <sup>-8</sup>       |
| Tel 6R <sup>tr</sup> + pAT4                  | 57          | 351 | 3.1×10 <sup>-10</sup> | 1.1×10 <sup>-20</sup>      | 54.3        | 105 | 6.4×10 <sup>-4</sup>       | 3.0×10 <sup>-5</sup>       |
| Tel 6R <sup>tr</sup> + pReb1N                | 56.9        | 239 | 2.3×10 <sup>-7</sup>  | 9.1×10 <sup>-14</sup>      | 50.9        | 53  | <b>6.6×10<sup>-2</sup></b> | 1.0×10 <sup>-2</sup>       |
| Tel 6R <sup>tr</sup> + pTbf1N                | 46.8        | 314 | 5.7×10 <sup>-4</sup>  | 2.5×10 <sup>-6</sup>       | 50.6        | 81  | 2.6×10 <sup>-2</sup>       | 1.7×10 <sup>-3</sup>       |
| Tel 6R <sup>tr</sup> <i>ku70Δ</i> + pAT4     | 47.4        | 133 | 2.0×10 <sup>-2</sup>  | 2.7×10 <sup>-3</sup>       | 59.3        | 86  | 6.4×10 <sup>-4</sup>       | 2.0×10 <sup>-6</sup>       |
| Tel 6R <sup>tr</sup> <i>ku70Δ</i> + pReb1N   | 37.1        | 239 | <b>0.4</b>            | <b>0.1</b>                 | 41.9        | 74  | <b>0.3</b>                 | <b>0.2</b>                 |
| Tel 6R <sup>tr</sup> <i>ku70Δ</i> + pTbf1N   | 38.9        | 368 | 4.3×10 <sup>-2</sup>  | 4.4×10 <sup>-2</sup>       | 51.9        | 89  | 1.3×10 <sup>-2</sup>       | 6.0×10 <sup>-4</sup>       |
| Tel 6R <sup>tr</sup> <i>ku70Δ</i> + pOrc2    | 47.5        | 198 | 4.1×10 <sup>-3</sup>  | 7.8×10 <sup>-4</sup>       | 51.9        | 79  | 1.8×10 <sup>-2</sup>       | 1.2×10 <sup>-3</sup>       |
| Tel 6R <sup>nat</sup> <i>sir4Δ</i> + pAT4    | 46.2        | 221 | 5.9×10 <sup>-3</sup>  | 8.3×10 <sup>-5</sup>       | 51.1        | 92  | 1.5×10 <sup>-2</sup>       | 2.3×10 <sup>-4</sup>       |
| Tel 6R <sup>nat</sup> <i>sir4Δ</i> + pReb1N  | 37.2        | 349 | <b>0.3</b>            | <b>0.2</b>                 | 40.8        | 169 | <b>0.2</b>                 | 2.8×10 <sup>-2</sup>       |
| Tel 6R <sup>nat</sup> <i>sir4Δ</i> + pTbf1N  | 43          | 207 | 4.3×10 <sup>-2</sup>  | 7.7×10 <sup>-3</sup>       | 50.6        | 87  | 2.1×10 <sup>-2</sup>       | 3.0×10 <sup>-3</sup>       |
| Tel 6R <sup>tr</sup> + pVP16                 | 37.6        | 234 | <b>0.3</b>            | <b>0.2</b>                 | 37.7        | 85  | <b>0.6</b>                 | <b>0.3</b>                 |
| Tel 8L <sup>nat</sup> + pVP16                | 46.6        | 148 | 2.0×10 <sup>-2</sup>  | 6.4×10 <sup>-4</sup>       | 54.4        | 57  | 2.4×10 <sup>-2</sup>       | 3.4×10 <sup>-3</sup>       |
| Tel 6R <sup>nat</sup> <i>tell1Δ</i> + pAT4   | 51.6        | 184 | 3.9×10 <sup>-4</sup>  | 5.8×10 <sup>-7</sup>       | 49.3        | 69  | <b>5.7×10<sup>-2</sup></b> | 1.7×10 <sup>-3</sup>       |
| Tel 6R <sup>nat</sup> <i>tell1Δ</i> + pReb1N | 36.9        | 306 | <b>0.4</b>            | <b>0.4</b>                 | 43.0        | 121 | <b>0.1</b>                 | 3.8×10 <sup>-2</sup>       |
| Tel 6R <sup>nat</sup> <i>tell1Δ</i> + pTbf1N | 43.9        | 312 | 6.7×10 <sup>-3</sup>  | 2.9×10 <sup>-4</sup>       | 47.0        | 83  | <b>5.5×10<sup>-2</sup></b> | 2.1×10 <sup>-3</sup>       |
| Tel 6R <sup>nat</sup> <i>tell1Δ</i> + pVP16  | 39.3        | 145 | <b>0.3</b>            | <b>0.1</b>                 | 45.5        | 55  | <b>0.2</b>                 | 5.0×10 <sup>-3</sup>       |
| Tel 6R <sup>tr</sup> <i>tell1Δ</i> + pAT4    | 51.6        | 184 | 1.9×10 <sup>-3</sup>  | 2.2×10 <sup>-5</sup>       | 49.3        | 69  | <b>0.1</b>                 | <b>8.0×10<sup>-2</sup></b> |
| Tel 6R <sup>tr</sup> <i>tell1Δ</i> + pReb1N  | 36.9        | 306 | <b>0.9</b>            | <b>0.4</b>                 | 43.0        | 121 | <b>0.5</b>                 | <b>6.3×10<sup>-2</sup></b> |
| Tel 6R <sup>tr</sup> <i>tell1Δ</i> + pTbf1N  | 43.9        | 312 | <b>0.5</b>            | <b>8.1×10<sup>-2</sup></b> | 46.0        | 111 | <b>0.4</b>                 | <b>0.2</b>                 |
| Tel 6R <sup>tr</sup> <i>tell1Δ</i> + pVP16   | 39.3        | 145 | <b>0.2</b>            | 7.9×10 <sup>-3</sup>       | 45.5        | 55  | <b>0.3</b>                 | <b>0.2</b>                 |

n represents the total number of cells counted for a specific condition, the p value is obtained with either a t-test comparing the proportion of total spots in zone 1 to the 33% theoretical random proportion, or with a Chi-squared test comparing telomeres in zones 1, 2 and 3 to a theoretical random distribution with an equal n. p values > 0.05 are in bold and indicate no significant difference from random distributions.
